# Supplementary material for: Structure and phase changes of alumina produced by flame hydrolysis
Source: Royal Society of Chemistry journal article supplement (doi:10.1039/d4dt01809e), 2024-01-01
Supplement: d4dt01809e1.pdf [file d4dt01809e1.pdf]

## Supporting Information

### Structure and Phase Changes of Alumina Produced by Flame Hydrolysis

**Jamal Nasir<sup>1</sup>, Franz Schmidt<sup>2</sup>, Frank Menzel<sup>2</sup>, Jörn Schmedt auf der Günne<sup>1\*</sup>**

*1 University of Siegen, Faculty IV: School of Science and Technology, Department of Chemistry and Biology, Inorganic materials chemistry and Center of Micro- and Nanochemistry and Engineering (Cμ), Adolf-Reichwein-Straße 2, D-57076 Siegen, Germany*

*2 Evonik, Operations GmbH, Rodenbacher Chaussee 4, D-63457 Hanau, Germany*

\*Email: gunnej@chemie.uni-siegen.de

- Figure S1:** Rietveld refinement as  $\gamma$ -alumina (S200 and S180)
- Table S1:** Parameters for Rietveld Refinement for the Sample S220
- Figure S2:** Spectral Simulations of  $^{27}\text{Al}$  MAS NMR Spectra
- Table S2:** Spectral Parameters Determined by Simulations Using the DMfit Software:
- Figure S3:**  $^{27}\text{Al}$  MQMAS Spectra of Fumed Alumina for the S220 to S45 Samples
- Figure S4:** Projections of  $^{27}\text{Al}$  MQMAS Spectra of Fumed Alumina for the S220–45 Samples
- Figure S5:** Aging Effect on the Local Structure of high BET Fumed Alumina
- Figure S6:** TEM Images of Fumed Alumina for the S220 to S30 Samples
- Figure S7:** Histograms for Particles Sizes for the S220 to S30 Samples
- Figure S8:** High-resolution TEM images of S65.

## Rietveld Refinement of the X-ray Patterns as $\gamma$ -Alumina for the S200 and S180 Samples

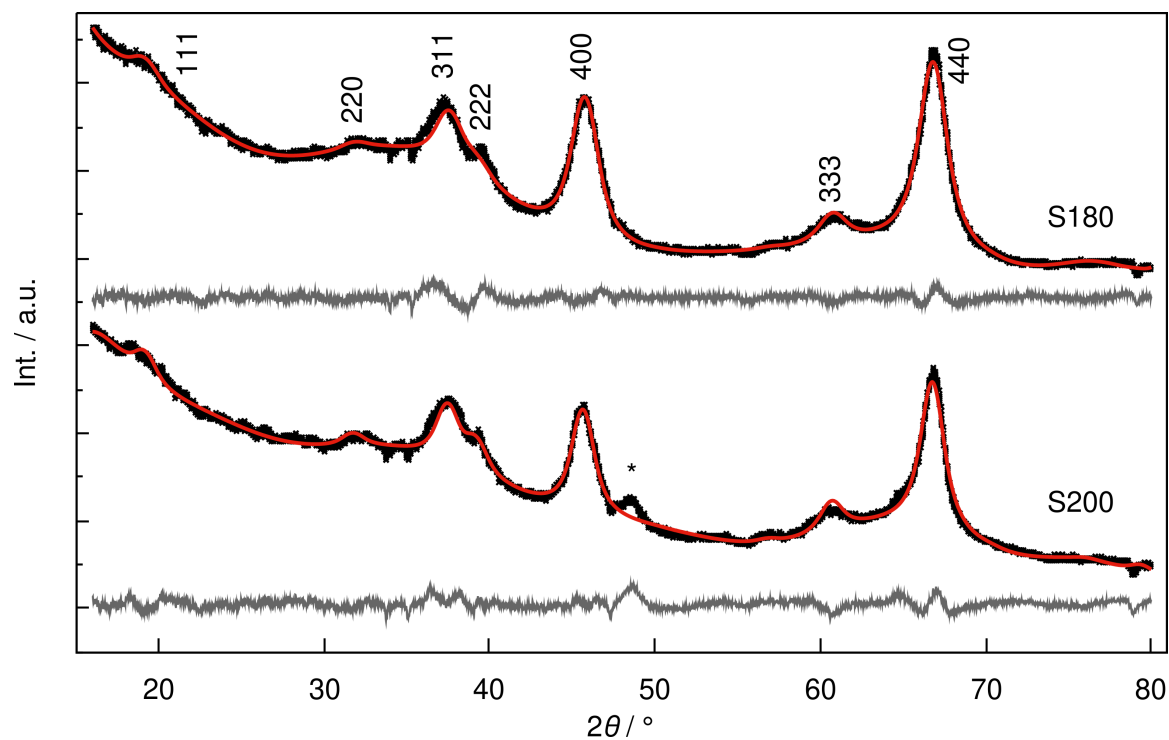

**Figure S1:** Rietveld refinement of the X-ray diffraction pattern for the S200 and S180 samples using Smrcok et al. spinel model for  $\gamma$ -alumina with a significant amount of non-spinel occupation. The black points represent the experimental data, the red solid line the calculated diffractogram with a residual profile factor  $R_{wp}$  respectively of 3.6% and 3.2%, and the grey line the difference plot. The peak marked with asterisk \* is non-existent in  $\gamma$ -alumina.

### Parameters for Rietveld refinement of $\gamma$ -alumina (S220)

**Table S1:** Exemplary Rietveld refinement input file (used in Topas academic package<sup>[1]</sup>) with the refined parameters for the S220 sample powder diffraction (Figure 2) recorded on Guinier camera.

|                                                                                                                                                                                                                                                                                                                                                                                                                                                                                                                                                                                                                                                                                                                  |
|------------------------------------------------------------------------------------------------------------------------------------------------------------------------------------------------------------------------------------------------------------------------------------------------------------------------------------------------------------------------------------------------------------------------------------------------------------------------------------------------------------------------------------------------------------------------------------------------------------------------------------------------------------------------------------------------------------------|
| <pre>r_wp 3.02719 r_exp 2.61441499 r_p 2.25241953 gof 1.15788427</pre>                                                                                                                                                                                                                                                                                                                                                                                                                                                                                                                                                                                                                                           |
| <pre>iters 100000 chi2_convergence_criteria 0.001 do_errors</pre>                                                                                                                                                                                                                                                                                                                                                                                                                                                                                                                                                                                                                                                |
| <pre>xdd BET220.xy  x_calculation_step = Yobs_dx_at(Xo); convolution_step 4 bkg @ 1376.83569`_1.42975713       -1071.80372`_1.87856674       189.442678`_1.8611632       -4.44479503`_1.74830992       -136.84087`_1.68499227       -49.7694861`_1.50821558       134.965508`_1.66444081       12.9518863`_1.93736098       -75.5144272`_1.49218123       -12.6398723`_1.49710774       15.7383351`_1.43657743       -13.0475097`_1.29415789       24.2915403`_1.12030175       16.4935932`_1.31027513  LP_Factor(!th2_monochromator, 27.28)      'd8 Ge(111) monochromator Vantec Cu Ka1 CuKa1(0.0001)  Specimen_Displacement(height, 0.592872541`_42.5013868) Specimen_Tilt(@, 1.10207389`_0.0500654427)</pre> |

Divergence( 0.823576214\_0.00574586197 )  
Simple\_Axial\_Model(!axial, 2.15331558\_0.00498608309)  
Tube\_Tails(, 0.00487350562,, -0.0388314018,, 0.00329872058\_LIMIT\_MIN\_1e-05,,  
0.0620669557)

Rp 220

Rs 57.3

'th2\_offset

prm a1 -1.57056476`\_39.9589523

prm a2 1.38586295`\_4.13264432

prm a3 0.644076644`\_85.1791326

th2\_offset = a1 Th^2 + a2 Th^1 + a3;

start\_X 16

finish\_X 80

Out\_Yobs\_Ycalc\_and\_Difference("S220\_Yobs\_Ycalc\_and\_Diff.txt")

Out\_X\_Yobs("S220\_Out\_X\_Yobs .txt")

str

phase\_name gamma-Al2O3

space\_group "F d -3 m Z"

Cubic (@ 7.933079`\_0.263268)

volume 499.258`\_49.710

site Al1 x = 0.125; y = 0.125; z = 0.125; occ Al+3 @ 0.42634`\_0.00754 beq 0.489532378

site Al2 x = 0.5; y = 0.5; z = 0.5; occ Al+3 @ 0.60394`\_0.00511 beq 0.726402884

site O1 x = 0.25673; y = 0.25673; z = 0.25673; occ O-2 1 beq 0.876420871

site Al3 x = 0.0; y = 0.0; z = 0.0; occ Al+3 @ 0.24762`\_0.00435 beq 0.710611517

site Al4 x = -0.123; y = 0.125; z = 0.125; occ Al+3 @ 0.08999`\_0.00264 beq 0.473741011

LVol\_FWHM\_CS\_G\_L(1, 5.19609424`\_0.422947564, 0.89, 7.26466565`\_0.581104289, , ,  
cslc, 8.16254567`\_0.652926168)

e0\_from\_Strain( 2.18048578e-07`\_0.000379272174, , , slc, 0.0001`\_0.173939301) 'eo single  
strain value from Gaussian / Lorentzian



scale @ 0.00120704504`\_1.678e-05

r\_bragg 0.205480314

Phase\_Density\_g\_on\_cm3( 3.61930318`\_0.360609447)

## Spectral Simulations of $^{27}\text{Al}$ MAS NMR Spectra

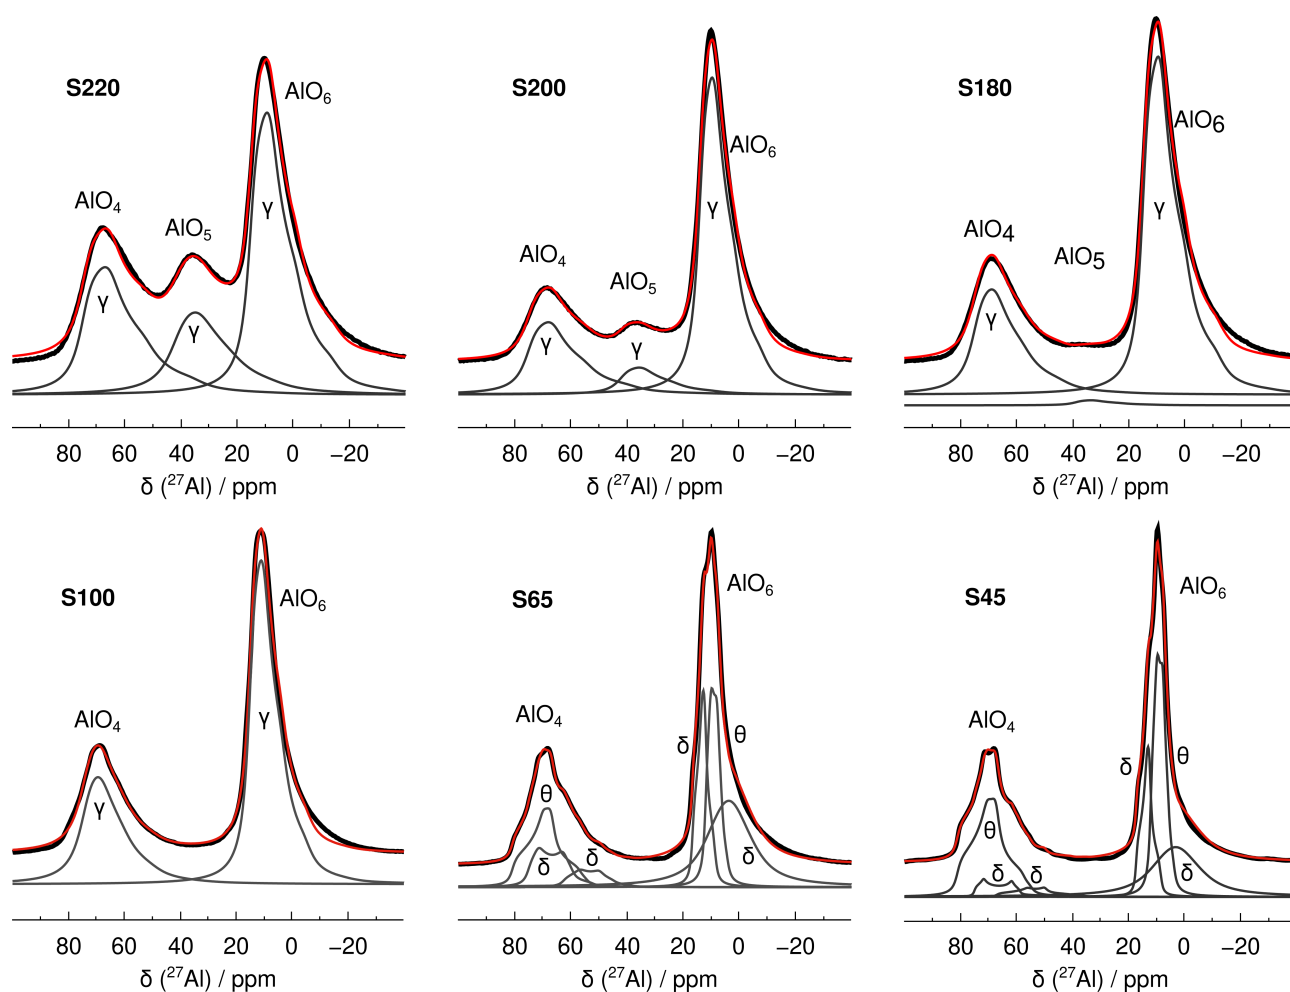

**Figure S2:**  $^{27}\text{Al}$  MAS NMR spectra simulated using Czjzek model for S220 to S100 samples, using Q mas 1/2 model for the S65–45 samples as implemented in DMfit software.<sup>[1]</sup> The experimental data are shown in black, the total simulated spectra in red, and the individual decomposed spectra in grey.

## Spectral Parameters Determined by Simulations Using DMfit Software

**Table S2:**  $^{27}\text{Al}$  MAS NMR parameters for the  $\text{AlO}_4$ ,  $\text{AlO}_5$  and  $\text{AlO}_6$  sites in fumed alumina materials obtained by using Dmfit package and the corresponding literature values.

| BET<br>$\text{m}^2/\text{g}$ | Main<br>phase     | Site           | $\delta_{\text{iso}}$ / ppm | $C_Q$ /<br>MHz | $\eta$     | Model<br>used | Relative<br>intensities | Comment                                          |
|------------------------------|-------------------|----------------|-----------------------------|----------------|------------|---------------|-------------------------|--------------------------------------------------|
|                              | $\gamma$ -alumina | $\text{AlO}_4$ | $77.5 \pm 0.2$              | $3.5 \pm 0.1$  |            | Czjzek        | 10%                     | [2]<br>DNP NMR                                   |
|                              |                   | $\text{AlO}_5$ | $37.2 \pm 0.2$              | $4.5 \pm 0.1$  |            |               | 13%                     |                                                  |
|                              |                   | $\text{AlO}_6$ | $14.0 \pm 0.2$              | $4.3 \pm 0.1$  |            |               | 78%                     |                                                  |
|                              | $\delta$ -alumina | $\text{AlO}_4$ | 73.2                        | 4.6            | 0.6        |               | 19.6%                   | [3]<br>Al isopropoxide<br>precursor; sol-<br>gel |
|                              |                   | $\text{AlO}_4$ | 68.3                        | 6.6            | 0.4        |               | 20.7%                   |                                                  |
|                              |                   | $\text{AlO}_6$ | 16.3                        | 4.8            | 0.0        |               | 25.8%                   |                                                  |
|                              |                   | $\text{AlO}_6$ | 14.5                        | 4.3            | 0.6        |               | 33.9%                   |                                                  |
|                              | $\theta$ -alumina | $\text{AlO}_4$ | 80 (1)                      | 6.4 (0.1)      | 0.65(0.02) |               | 47.8%                   | [4] Al tributoxide<br>precursor; sol-<br>gel     |
|                              |                   | $\text{AlO}_6$ | 10.5 (1)                    | 3.5 (0.3)      | 0(0.1)     |               | 52.2%                   |                                                  |
| S220                         | $\gamma$ -alumina | $\text{AlO}_4$ | 75                          | 6.6            |            | Czjzek        | 30.1%                   | This study                                       |
|                              |                   | $\text{AlO}_5$ | 42                          | 6.2            |            |               | 21.5%                   |                                                  |
|                              |                   | $\text{AlO}_6$ | 15.3                        | 5.6            |            |               | 48.4%                   |                                                  |
| S200                         | $\gamma$ -alumina | $\text{AlO}_4$ | 75.2                        | 6.3            |            | Czjzek        | 24.5%                   | This study                                       |
|                              |                   | $\text{AlO}_5$ | 42.2                        | 6              |            |               | 8.6%                    |                                                  |
|                              |                   | $\text{AlO}_6$ | 14                          | 4.9            |            |               | 66.9%                   |                                                  |
| S180                         | $\gamma$ -alumina | $\text{AlO}_4$ | 75                          | 5.8            |            | Czjzek        | 28.8%                   | This study                                       |
|                              |                   | $\text{AlO}_5$ | 39                          | 5.5            |            |               | 1.2%                    |                                                  |
|                              |                   | $\text{AlO}_6$ | 15                          | 5.4            |            |               | 70%                     |                                                  |
| S130                         | $\gamma$ -alumina | $\text{AlO}_4$ | 74.4                        | 5.4            |            | Czjzek        | 31%                     | This study                                       |
|                              |                   | $\text{AlO}_6$ | 15                          | 5.1            |            |               | 69%                     |                                                  |
| S100                         |                   | $\text{AlO}_4$ | 74.4                        | 5.1            |            | Czjzek        | 33%                     | This study                                       |
|                              |                   | $\text{AlO}_6$ | 15.0                        | 4.7            |            |               | 66.7%                   |                                                  |
| S65                          | $\theta$ -alumina | $\text{AlO}_4$ | 80.9                        | 6.3            | 0.8        | Q mas         | 17.9%                   | This study                                       |

|     |           |                  |      |     |     |              |       |            |
|-----|-----------|------------------|------|-----|-----|--------------|-------|------------|
|     |           | AlO <sub>6</sub> | 12.3 | 3.6 | 0.4 | 1/2          | 19%   |            |
|     | δ-alumina | AlO <sub>4</sub> | 77   | 6.3 | 0.3 |              | 9.5%  |            |
|     |           | AlO <sub>4</sub> | 64   | 6.3 | 0.4 |              | 4.5%  |            |
|     |           | AlO <sub>6</sub> | 16.6 | 3.5 | 0.8 |              | 16.2% |            |
|     |           | AlO <sub>6</sub> | 11.1 | 5   | 0.7 |              | 32.8% |            |
| S45 | θ-alumina | AlO <sub>4</sub> | 81.3 | 6.3 | 0.8 | Q mas<br>1/2 | 27%   | This study |
|     |           | AlO <sub>6</sub> | 12.4 | 3.7 | 0.5 |              | 27.3% |            |
|     | δ-alumina | AlO <sub>4</sub> | 77.4 | 6.6 | 0.2 |              | 4.1%  |            |
|     |           | AlO <sub>4</sub> | 67.6 | 7.1 | 0.6 |              | 3%    |            |
|     |           | AlO <sub>6</sub> | 17.3 | 3.6 | 0.8 |              | 14%   |            |
|     |           | AlO <sub>6</sub> | 10.8 | 5   | 0.9 |              | 24.7% |            |
| S30 | θ-alumina | AlO <sub>4</sub> | 80.4 | 6.1 | 0.9 | Q mas<br>1/2 | 15.6% | This study |
|     |           | AlO <sub>6</sub> | 12.7 | 3.9 | 0.5 |              | 18.3% |            |
|     | δ-alumina | AlO <sub>4</sub> | 76.6 | 6.4 | 0.2 |              | 8%    |            |
|     |           | AlO <sub>4</sub> | 73.3 | 8.3 | 0.7 |              | 9%    |            |
|     |           | AlO <sub>6</sub> | 16.4 | 3.3 | 1   |              | 24.1% |            |
|     |           | AlO <sub>6</sub> | 10.2 | 5.2 | 0.7 |              | 25%   |            |

## <sup>27</sup>Al MQMAS Spectra of Fumed Alumina for the S220–45 Samples

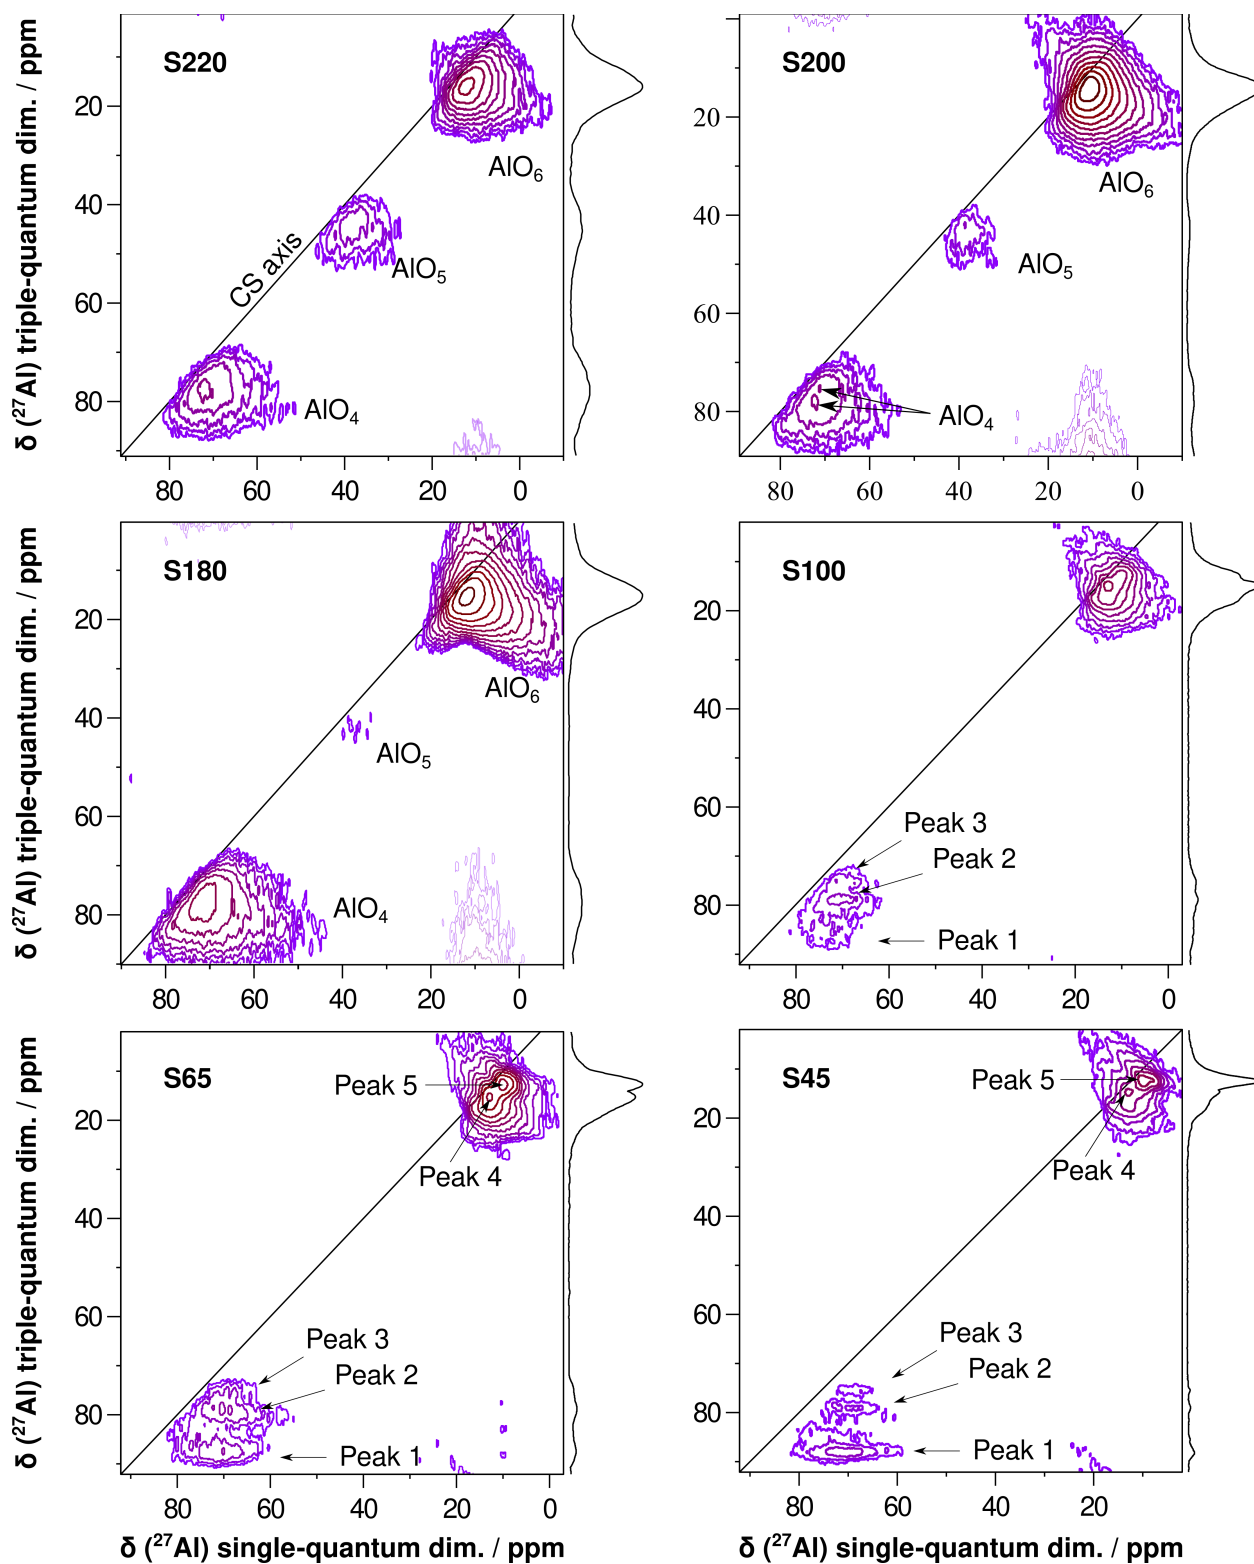

**Figure S3:** Sheared <sup>27</sup>Al triple-quantum MQMAS NMR spectra of fumed alumina for the S220 to S45 samples measured at 20 kHz MAS frequency. The sum projection of the isotropic spectra are shown on the right of each 2D spectrum.

Projections of  $^{27}\text{Al}$  MQMAS Spectra of Fumed Alumina for the S220–45 Samples

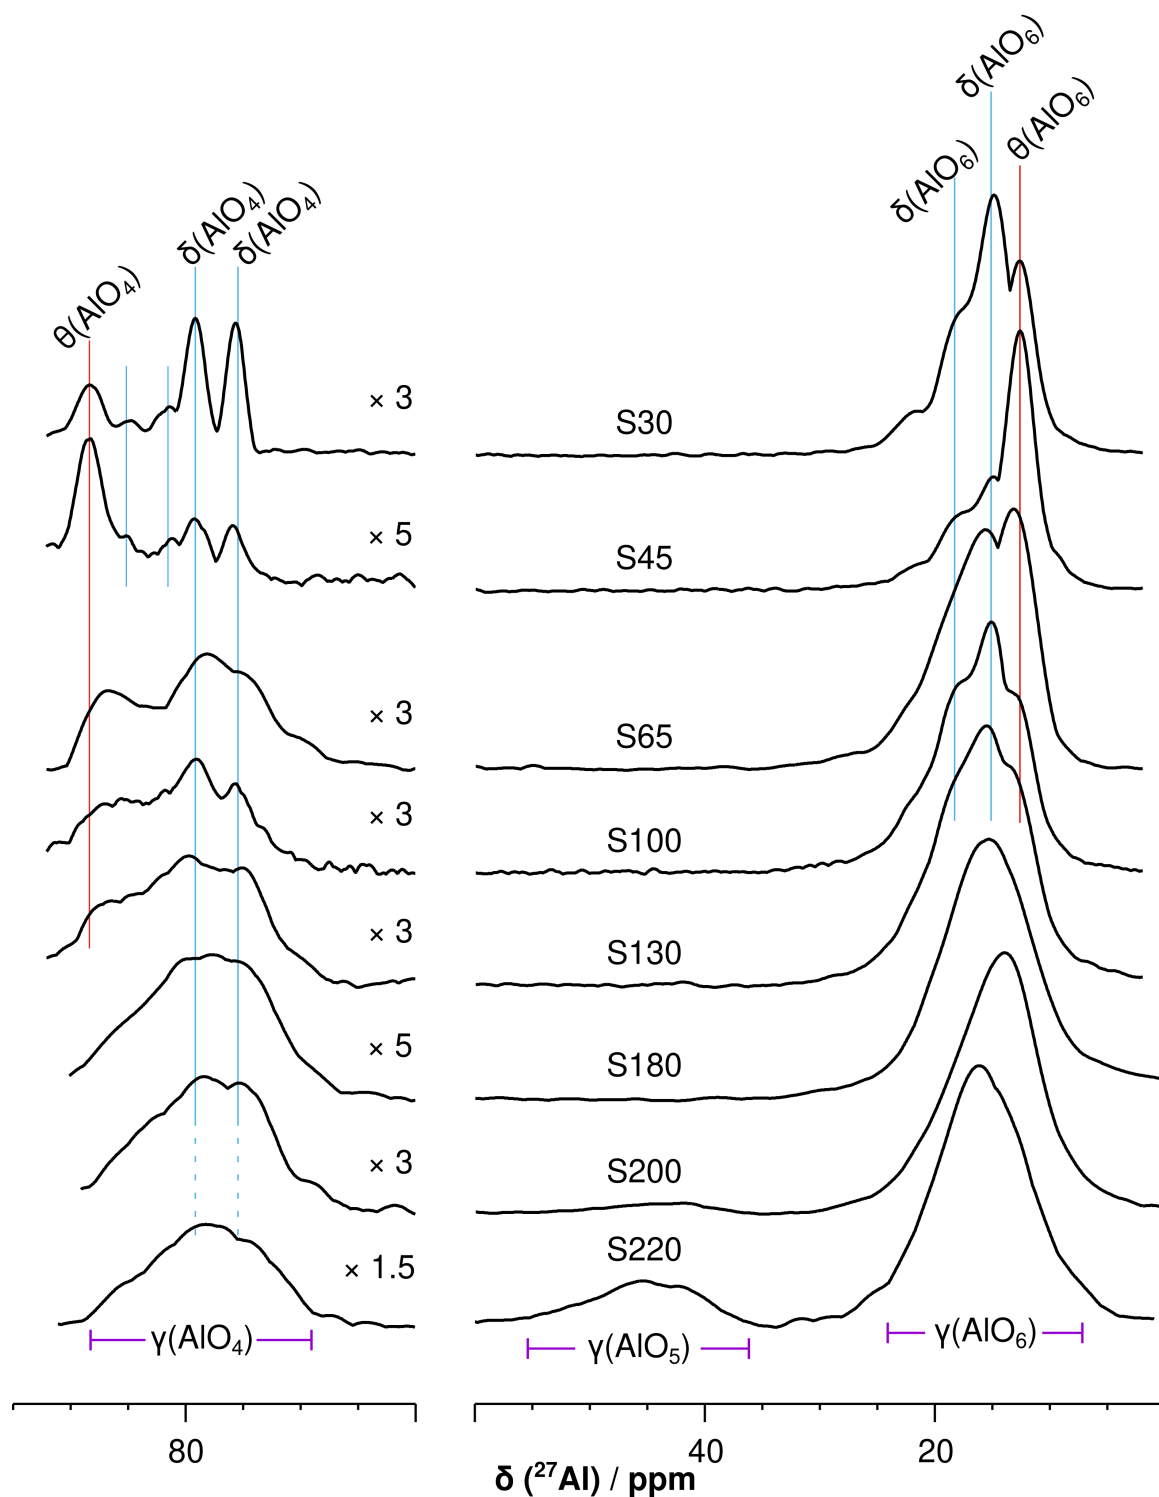

**Figure S4:** Sum projections of  $^{27}\text{Al}$  triple-quantum MQMAS spectra of fumed alumina samples with S220–30 measured at 20 kHz MAS frequency. In the shearing execution, not all the 2D spectra are shifted by the same value.

## Aging Effect on the Local Structure of High BET Fumed Alumina

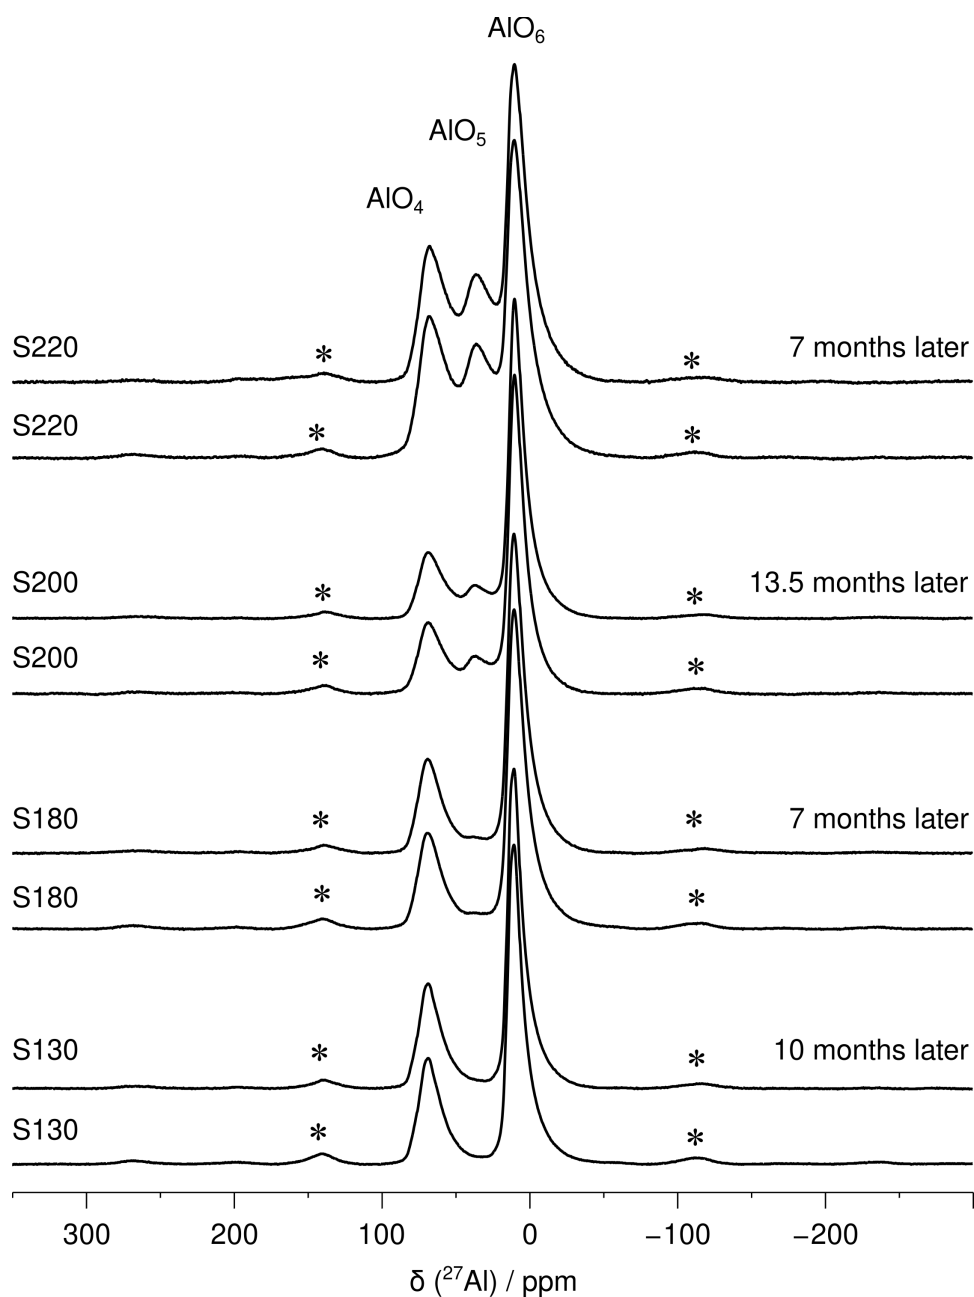

**Figure S5:**  $^{27}\text{Al}$  MAS NMR spectra intended to reveal an aging effect on the samples S220 to S130 measured at 20 kHz MAS frequency a second time after various periods of time. As is obvious, there is no noticeable change in the shape or intensities of the spectra.

### TEM Images of Fumed Alumina for the S220 to S30 Samples

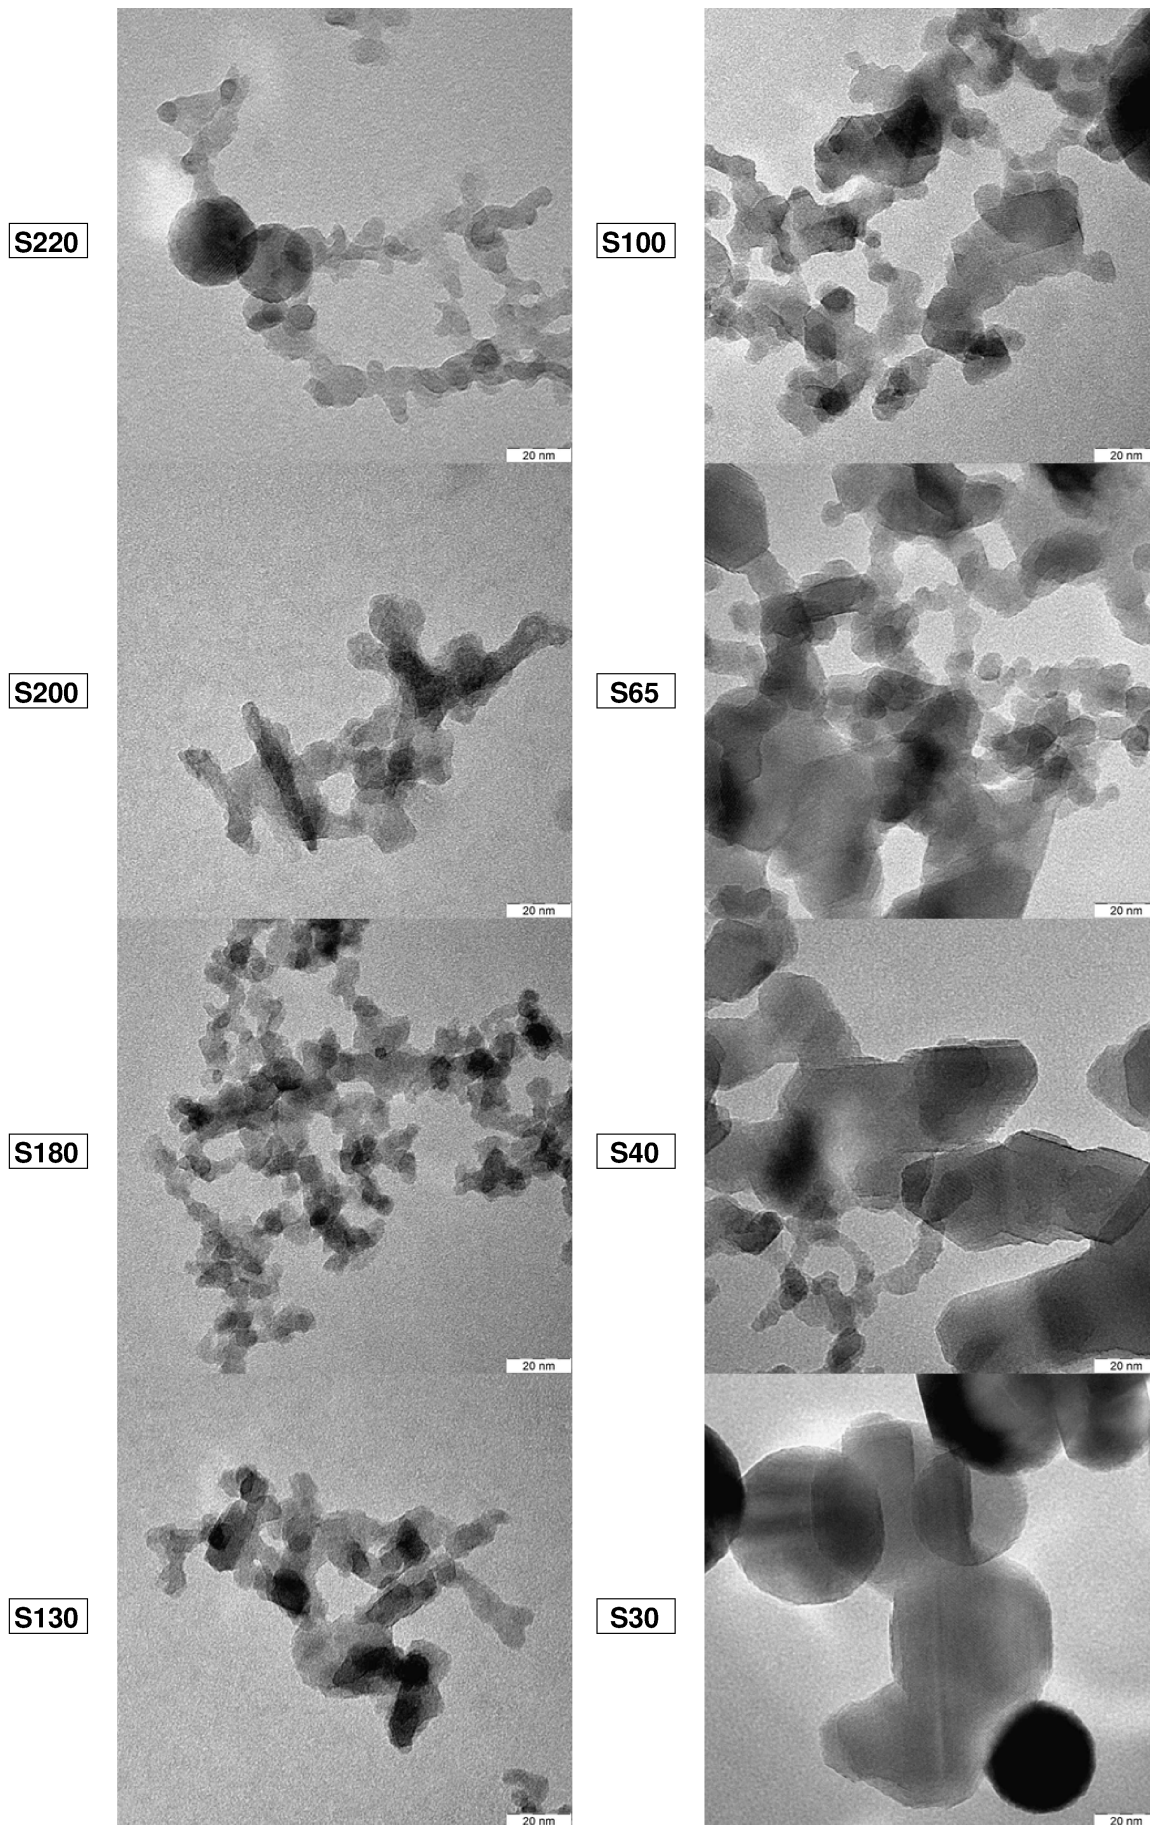

**Figure S6:** TEM images of fumed alumina samples S220 to S30 samples.



## Histograms for Particles Sizes for the S220 to S30 Samples

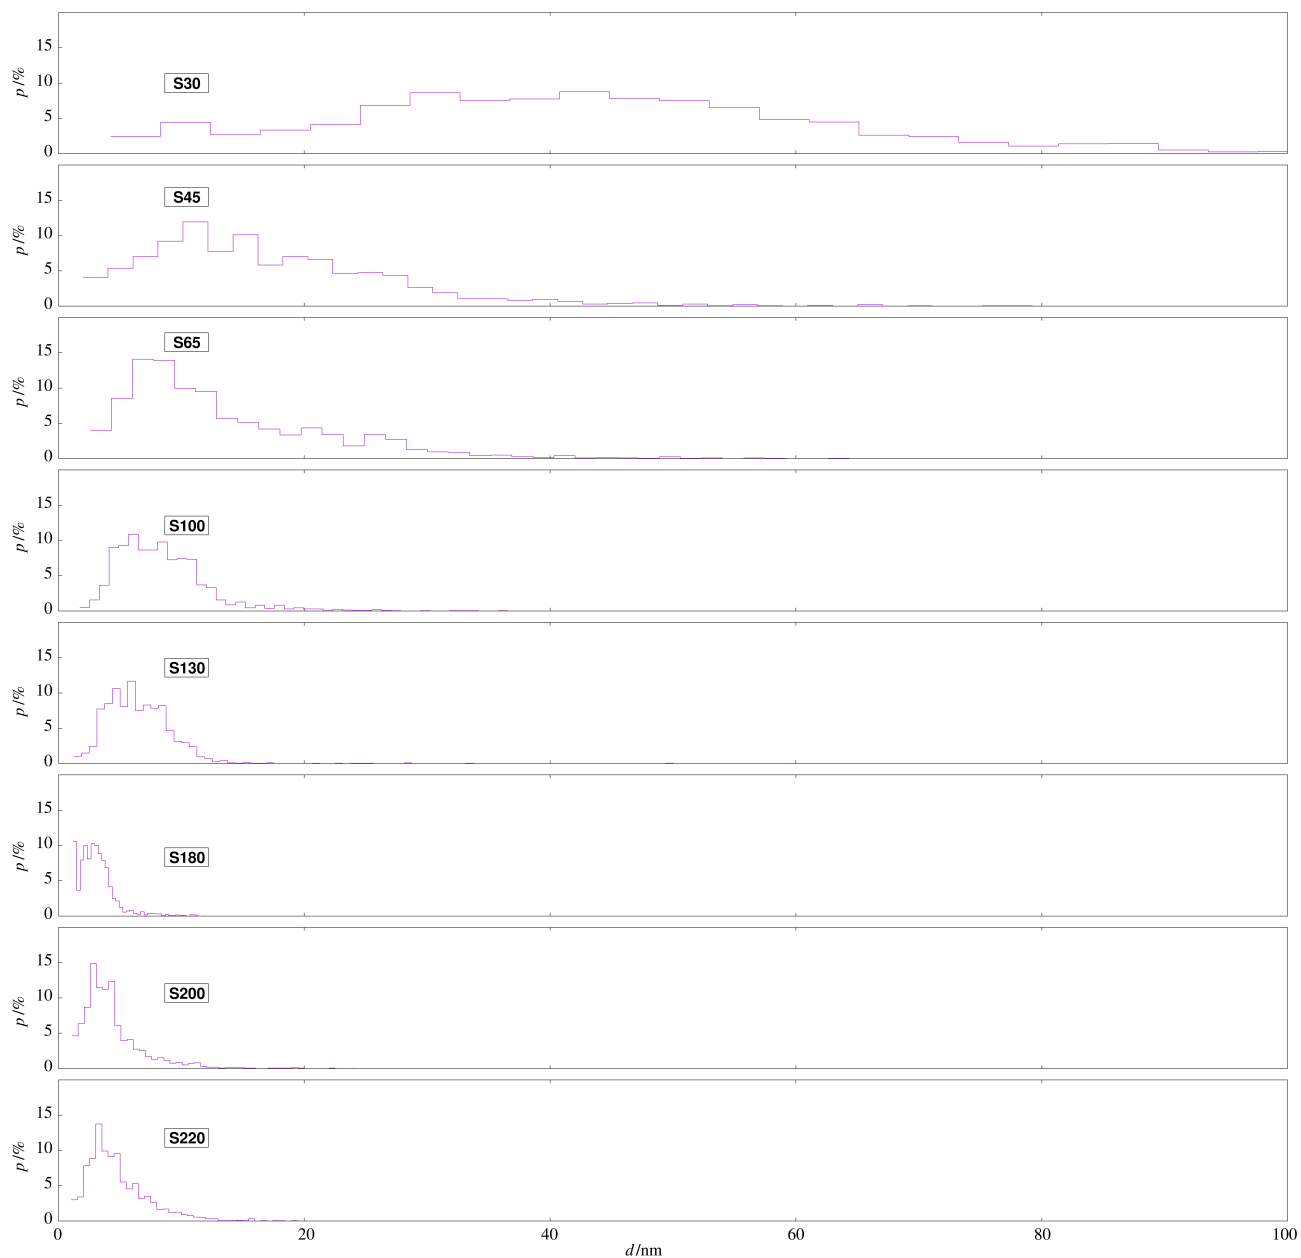

**Figure S7:** Particle size distribution of the fumed alumina samples S220 to S30 obtained by analysis of TEM micrographs of about 2000 particles each. For agglomerates the primary particles were counted.

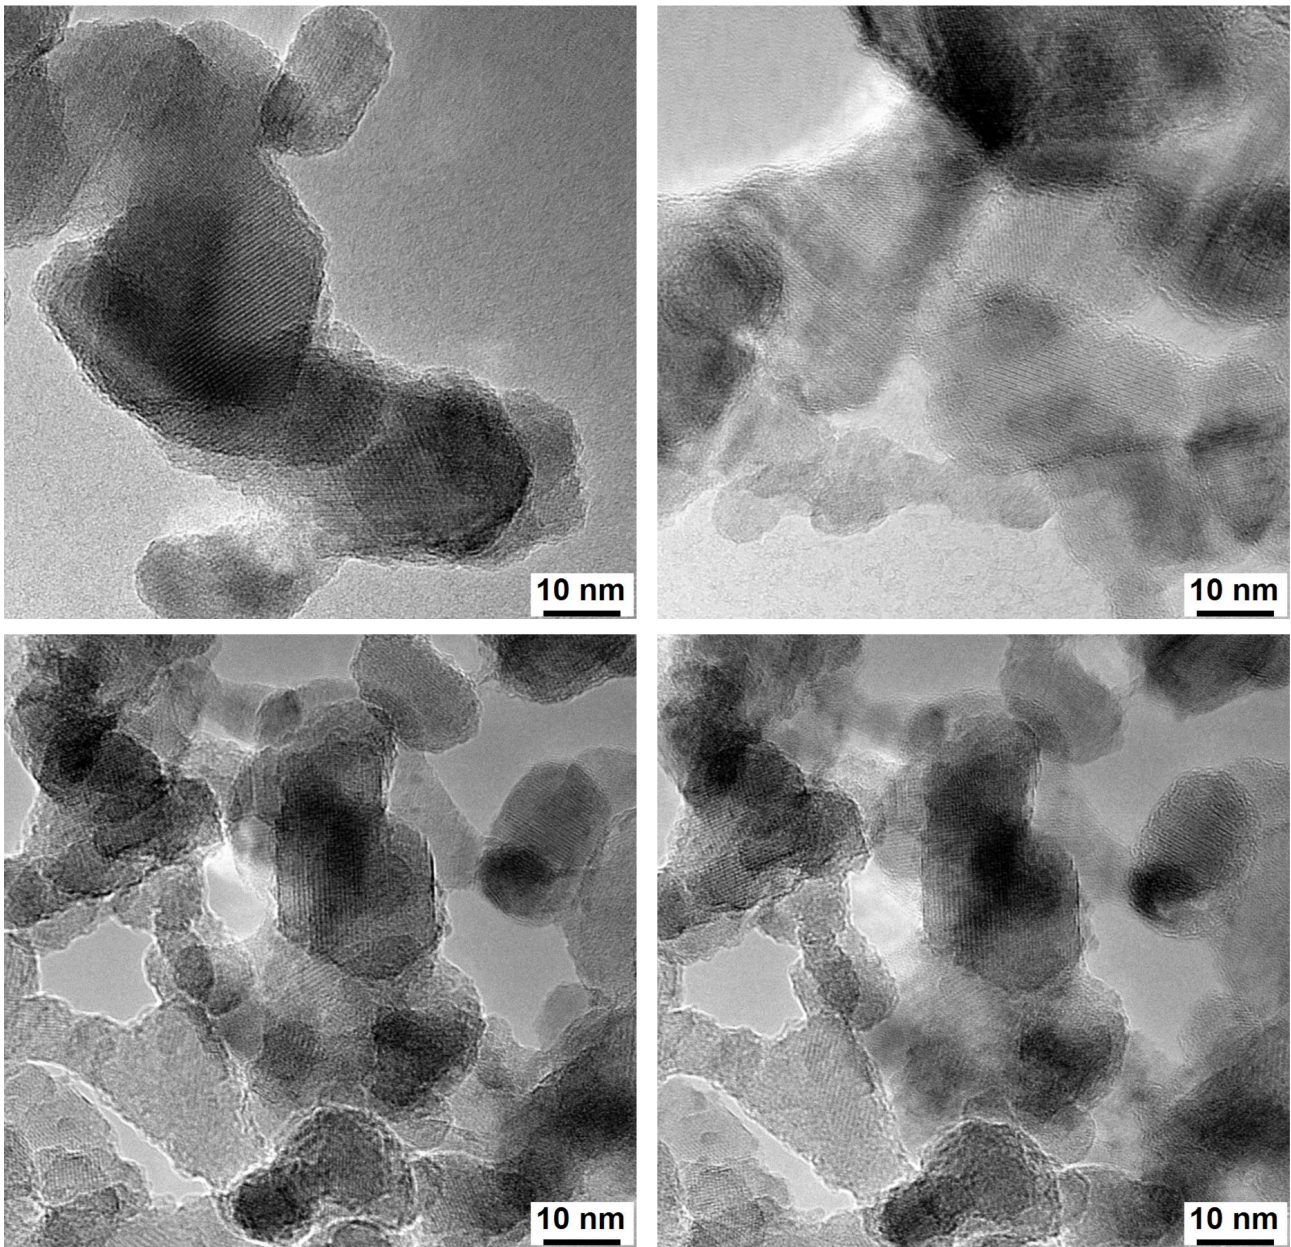

**Figure S8:** High-resolution TEM pictures of fumed alumina S65. The picture sure primary particles of different sizes which are the result of nucleation (small monocrystalline particles), collision and coalescence (bigger monocrystalline particles) and agglomeration and aggregation (bigger polycrystalline particles).

## References

- [1] A.A. Coelho, *J. Appl. Cryst.* 51 (2018) 210–218.
- [2] M. Mais, S. Paul, N.S. Barrow, J.J. Titman, *Johnson Matthey Technol. Rev.* 62 (2018) 271–278.
- [3] S. Xu, N.R. Jaegers, W. Hu, J.H. Kwak, X. Bao, J. Sun, Y. Wang, J.Z. Hu, *ACS Omega* 6 (2021) 4090–4099.
- [4] L.A. O'Dell, S.L.P. Savin, A.V. Chadwick, M.E. Smith, *Solid State Nucl. Magn. Reson.* 31 (2007) 169–173.
